# Supplementary material
Source: publisher figshare collection journal article supplement (https://frontiersin.figshare.com/ndownloader/files/14340449)
Supplement: Supplementary file 1 [file 14340449]

**SUPPLEMENTARY INFORMATION**

**S1. Materials and Methods.**

Based on new available bibliography and personal observations of several materials (Brissón Egli et al., 2017; Novas et al., 2018) we re-scored *Austroraptor cabazai* (MML-195; MML-220), *Unenlagia comahuensis* (MCF Pv-PH 78) and *Buitreraptor* *gonzalezorum* (MPCA-PV-598) at one of the last versions of the TWiG data-matrix (Gianechini et al., 2017). 132 characters score were re-scored (see below) for these taxa. Phylogenetic analysis was performed using TNT v. 1.5beta (Goloboff et al. 2008). A heuristic search was performed with 1000 replicates of the tree bisection and reconnection (TBR branch-swapping algorithm). The maximum number of trees saved for each random addition sequence replicate was set to 10. The phylogenetic analysis using the modified data set from Gianechini et al. (2017) resulted in the recovery of 140 Most Parsimonious Trees (MPTs), which bring a Strict Consensus Tree of 2227 steps, with a consistency index of 0.283, and a retention index of 0724.

**S2. Changes on character codings of Gianechini et al., (2017) data matrix.**

**Uninformative characters:** Mapping of uninformative characters indicates that characters 252, 294, 301, 304, 326, 373, 374, 393, 409, 446 and 452 are uninformative.

**Character 5:** Postorbital bar

0: parallels quadrate, lower temporal fenestra rectangular in shape

1: jugal and postorbital approach or contact quadratojugal to constrict lower temporal

fenestra

**Comment**. The original codification was changed from “0” to “?” in *Austroraptor*. In fact, the postorbital is complete in *Austroraptor*, but the cuadratojugal and the jugal are unknown in *Austroraptor*, and thus, its condition is uncertain.

**Character 24:** Secondary palate

0: short

1: long, with extensive palatal shelves on maxilla

**Comment**. In the case of *Buitreraptor*, it was originally scored as “1”. However, we were unable to observe the morphology of the palatal region because it is covered by matrix. In consequence, we code it as “?”. In the case of *Austroraptor*, this taxon was coded as uncertain “?” by Gianechini et al. (2017). However, personal observation of the maxilla of *Austroraptor* indicates that the palatal shelves were anteroposteriorly extensive, and thus, was recoded as “1”.

**Character 25:** Palatal shelf of maxilla

0: flat

1: with midline ventral ‘‘toothlike’’ projection

**Comment**. In the case of *Buitreraptor*, it was originally scored as “1”. However, we were unable to observe the morphology of the palatal region because it is covered by matrix. In consequence, we code it as “?”. In the case of *Austroraptor*, this taxon was coded as uncertain “?” by Gianechini et al. (2017). However, personal observation of the maxilla of *Austroraptor* indicates that the palatal shelf of maxilla lacks a toothlike projection, and thus, was recoded as “0”.

**Character 36:** Supraorbital crests on lacrimal in adult individuals

0: absent

1: dorsal crest above orbit

2: lateral expansion anterior and dorsal to orbit

**Comment**. *Austroraptor* was coded as “?” for this character. However, the lacrimal bone is complete and shows a narrow, but laterally projected crest above the orbit, and thus is coded as “1”.

**Character 63:** Dentary symphyseal region

0: in line with main part of buccal edge

1: symphyseal end downturned

**Comment**. This character was changed from “?” to “1” in *Austroraptor* based on personal inspection of specimen (Novas et al., 2009).

**Character 68:** Nutrient foramina on external surface of dentary (Currie, 1987)

0: superficial

1: lying within deep groove

**Comment.** As detailed by Agnolin and Novas (2011) the lateral surface of the dentary shows a longitudinal groove housing nutrient foramina, and thus, the scoring is changed from “0” to “1” in *Austroraptor*.

**Character 82:** Serration denticles (Farlow et al., 1991, quantify this difference)

0: large

1: small

**Comment**. We changed the codifications from “?” to “–“ in *Buitreraptor* and *Austroraptor*.

**Character 83:** Serrations

0: simple, denticles convex

1: distal and often mesial edges of teeth with large, hooked denticles that point toward

the tip of the crown

**Comment**. We changed the codifications from “?” to “–“ in *Buitreraptor* and *Austroraptor*.

**Character 86**: Dentaries lack distinct interdental plates (0) or with interdental plates medially between teeth (1).

**Comment.** We follow the criterion of Agnolin and Novas (2011) that considered that in *Buitreraptor* the interdental plates are covered by matrix, and thus, its condition is uncertain. In sum, we change the codification from “0” to “?”

**Character 95:** Cervical neural spines (Makovicky and Sues, 1998)

0: anteroposteriorly long

1: short and centered on neural arch, giving arch an X shape in dorsal view

**Comment**. Recodified from “?” to “1” in *Austroraptor*. Cervical vertebrae clearly show a reduced neural spine that results in a “X” shaped neural arch in dorsal view (Novas et al., 2009; Gianechini, 2015).

**Character 100:** Hyposphene-hypantrum articulations in trunk vertebrae

0: absent

1: present

**Comment**. Recodified from “?” to “1” in *Austroraptor*. Dorsal vertebrae clearly show a hyposphene-hypantrum articulation (Novas et al., 2009; Gianechini, 2015).

**Character 101:** Zygapophyses of trunk vertebrae

0: abutting one another above neural canal, opposite hyposphenes meet to form lamina

1: lateral to neural canal and separated by groove for interspinous ligaments,

hyposphenes separated

**Comment**. Recodified from “?” to “1” in *Austroraptor*. Dorsal vertebrae clearly show a lamina uniting opposing hyposphenes (Novas et al., 2009; Gianechini, 2015).

**Character 103:** Transverse processes of anterior dorsal vertebrae

0: long and thin

1: short, wide, and only slightly inclined

**Comment**. There are no completely preserved anterior dorsals in *Unenlagia*, and thus, this condition is rescored as uncertain “?”.

**Character 105:** Scars for interspinous ligaments

0: terminate at apex of neural spine in dorsal vertebrae

1: terminate below apex of neural spine

**Comment**. The scoring was changed from “?” to “1” in *Buitreraptor*. This is exemplified by posterior dorsal vertebrae of the holotype specimen of *Buitreraptor* (MPCA-245), in which the interspinous scar terminates well bellow the apex.

Recodified from “?” to “0” in *Austroraptor*. Dorsal vertebrae clearly show interspinous ligamental scars reaching the apex of the neural spine (Novas et al., 2009; Gianechini, 2015).

**Character 106:** Number of sacral vertebrae ORDERED

0: 5 or fewer

1: 6

2: 7

3: 8

4: 9

5: 10

6: 11 or more

7: 15 or more

**Comment**. Recently described specimen of *Buitreraptor* indicates that there are 6 sacral vertebrae, and thus, it was scored accordingly (Novas et al., 2017). We rescored it from “0” to “1” in *Buitreraptor*.

**Character 107:** Sacral vertebrae

0: with unfused zygapophyses

1: with fused zygapophyses forming a sinuous ridge in dorsal view

**Comment**. This was rescored from “?” to “0” in *Buitreraptor* (Novas et al., 2017).

**Character 109:** Pleurocoels ORDERED

0: absent on sacral vertebrae

1: present on anterior sacrals only

2: present on all sacrals

**Comment**. The exposed lateral surface of the sacrum of Unenlagia shows that the vertebral centra lack any sign of pleurocoels, and thus this character was rescored from “?” to “0” in *Unenlagia/Neuquenraptor*.

**Character 116:** Prezygapophyses of distal caudal vertebrae

0: between 1/3 and 1 centrum length

1: with extremely long extensions of the prezygapophyses (up to 10 vertebral segments

long in some taxa)

2: strongly reduced or absent

3: prezygapophyses clasping the posterior surface of neural arch of preceding vertebrae,

postzygapophyses negligible

**Comment.** As indicated by Motta et al (2017), distal caudal vertebrae of *Buitreraptor* show prezygapophysis that are between 1/3 and 1 centrum in length, and thus we rescored *Buitreraptor* from “2” to “0”

**Character 128:** Hypocledium on furcula ORDERED

0: absent

1: present as tubercle

2: present as an elongate process
**Comment.** As indicated by Novas et al (2017), the furcula of *Buitreraptor* shows a well-developed hypocleidal process that is present as a small sub-triangular process. We rescore the character from “0” to “1” in *Buitreraptor*.

**Character 135:** Scapula length

0: longer than humerus

1: humerus longer than scapula

**Comment.** The humerus of *Unenlagia* lacks its distal half and the scapula is incompletely preserved, lacking its distal tip. Thus, the original length of both elements remains unknown. We rescore this character from “0” to “?” in *Neuquenraptor*/*Unenlagia*

**Character 142:** Two distal carpals in contact with metacarpals

0: one covering the base of metacarpal I (and perhaps contacting metacarpal II) the other covering the base of metacarpal II

1: a single distal carpal capping metacarpals I and II

**Character 143:** Semilunate distal carpal

0: well developed, covering all of proximal ends of metacarpals I and II

1: small, covers about half of base of metacarpals I and II

2: covers bases of all metacarpals

3: covers MC II and MC III

**Comment.** Characters 142 and 143 partially overlapp each other. It may be probably more usefull to merge both in a single one. Ganiechini et al. (2017) coded this as “?”. However, the new *Buitreraptor* specimen described by Novas et al. (2017) clearly shows the presence of a small semilunate distal carpal covering bases of metacarpals I and II.

**Character 146:** Manual unguals

0: strongly curved, with large flexor tubercles

1: weakly curved with weak flexor tubercles displaced distally from articular end

2: straight with weak flexor tubercles displaced distally from articular end

3: absent

**Comment.** As indicated by the recently described specimen MPCN-Pv-598 the manual unguals of *Buitreraptor* are small, but strongly curved and bearing large flexor tubercles, and thus we rescore the character from “?” to “0” in *Buitreraptor*

**Character 147:** Unguals on all digits

0: generally similar in size

1: digit I bearing large ungual and unguals of other digits distinctly smaller

**Comment.** The newly collected specimen of *Austroraptor* by Currie and Carabajal (2012), preserves all three manual unguals, that although they slightly differ in size, they are similar in morphology as in *Buitreraptor*. Character rescored from “?“ to “0” in *Austroraptor*.

**Character 148:** Proximodorsal ‘‘lip’’ on some manual unguals—a transverse ridge immediately dorsal to the articulating surface

0: absent

1: present

**Comment.** As indicated by Novas et al (2017), the manual ungueals of *Buitreraptor* show a transverse lip on the proximodorsal surface. Additionally, a completely preserved manual ungueal of *Austroraptor* (MML-195) also shows the presence of a transverse lip on its proximodorsal surface. Character rescored from “?” to “1” in *Buitreraptor* and *Austroraptor.*

**Character 149:** Ventral edge of anterior ala of ilium

0: straight or gently curved

1: ventral edge with shallow, obtuse process

2: process strongly hooked

**Comment**. On the basis of a newly collected specimen, *Buitreraptor* is recoded as 1/2 (Novas et al., 2017).

**Character 150:** Preacetabular part of ilium

0: roughly as long as postacetabular part of ilium

1: preacetabular portion of ilium markedly longer (more than 2/3 of total ilium length) than postacetabular part

2: postacetabular blade much longer

**Comment**. *Buitreraptor* shows a markedly expanded preacetabular blade, as demonstrated by referred specimens (Gianechini, 2015; Novas et al., 2017). Thus, it is here rescored from “?” to “1”.

**Character 154:** Postacetabular blades of ilia in dorsal view

0: subparallel

1: diverge posteriorly

**Comment**. Based on available evidence afforded by the new specimen of *Buitreraptor* described by Novas et al. (2017) this taxon is rescored from “?” to “1”. Present description of *Unenlagia* allows to rescore from “?” to “0”.

**Character 157:** Antitrochanter posterior to acetabulum

0: absent or poorly developed

1: prominent

**Comment.** Based on Agnolin and Novas (2011) the antitrochanter in *Unenlagia* is here coded as prominent “1”.

**Character 158:** Ridge bounding cuppedicus fossa

0: terminates rostral to acetabulum or curves ventrally onto anterior end of pubic peduncle

1: rim extends far posteriorly and is confluent or almost confluent with acetabular rim

**Comment**. Based on Novas et al. (2017), *Buitreraptor* is rescored from “?” to “1”.

**Character 159:** Cuppedicus fossa

0: deep, ventrally concave

1: fossa shallow or flat, with little or no lateral overhang

2: absent

**Comment**. Based on Novas et al. (2017), *Buitreraptor* is rescored from “?” to “1”.

**Character 162:** Ischiadic shaft

0: straight

1: ventrodistally curved anteriorly

2: hooked posteriorly

**Comment**. Based on Novas et al. (2017), *Buitreraptor* is rescored from “0/2” to “0”.

**Character 164:** Obturator process of ischium ORDERED

0: absent

1: proximal in position

2: located near middle of ischiadic shaft

3: located at distal end of ischium

**Comment.** As indicated in the text, the obturator process of the ischium in *Unenlagia* is located near the distal end of the bone, and not at mid-length. In consequence, we rescored this character from “2” to “3”.

**Character 165:** Obturator process

0: does not contact pubis

1: contacts pubis

**Comment**. In *Buitreraptor* the obturator process of ischium does not contact the pubic shaft, and consequently is here rescored from “?” to “0”.

**Character 166:** Obturator notch

0: present

1: notch or foramen absent

**Comment**. In *Buitreraptor* the obturator notch of ischium is absent, and consequently is here rescored from “?” to “0”.

**Character 169:** Distal ends of ischia ORDERED

0: form symphysis

1: approach one another but do not form symphysis

2: widely separated

**Comment**. Based on holotype and referred specimens, the symphysis in *Buitreraptor*, as well as in *Unenlagia*, appears to be absent. As indicated in the text, in these taxa the ischia approach each other, but are not in contact. Consequently, in *Buitreraptor* we rescored it from “?” to “1”.

**Character 171:** Tubercle on anterior edge of ischium

0: absent

1: present

**Comment**. Presence of a tubercle on the ischium in *Buitreraptor* cannot be observed on the well-preserved holotype specimen (Makovicky et al., 2005). In consequence, it was changed in the data matrix from “?” to “1”.

**Character 173:** Pubic boot projects

0: anteriorly and posteriorly

1: with little or no anterior process

2: no anteroposterior projections

**Comment**. Based on Novas et al. (2017), we changed the score of *Buitreraptor* from “?” to “1”.

**Character 174:** Shelf on pubic shaft proximal to symphysis (‘‘pubic apron’’)

0: extends medially from middle of cylindrical pubic shaft

1: shelf extends medially from anterior edge of anteroposteriorly flattened shaft

2: absent

**Comment**. Based on the holotype specimen (MML 195) *Austroraptor* is here rescored from “?” to “1”.

**Character 175:** Pubic shaft

0: straight

1: distal end curves anteriorly, anterior surface of shaft concave

2: shaft curves posteriorly, anteriorly convex curvature

**Comment**. Based on the holotype specimen (MML 195) *Austroraptor* is here rescored from “?” to “0”.

**Character 177:** Contact between pubic apron

0: contributions of both pubes meet extensively

1: contact disrupted by a slit

2: no contact

**Comment**. Based on Novas et al. (2017) *Buitreraptor* is rescored from “?” to “1”. Further, *Unenlagia* shows a distal slit saparating both aprons near the distal end of cojoined pubes. In this way we rescored this character from “2” to “1”.

**Character 178:** Femoral head

0: without fovea capitalis (for attachment of capital ligament)

1: or circular fovea present in center of medial surface of head

**Comment**. Based on present analysis we rescored this character from “0” to “1” in *Neuquenraptor*/*Unenlagia*.

**Character 182:** Fourth trochanter on femur

0: present

1: absent (modificar , agregar estado)

2: fourth trochanter reduced, scar-like groove with shallow margins.

**Comment.** As indicated by Brissón Egli et al. (2017) and Novas et al. (2017) the fourth trochanter in unenlagiids as *Austroraptor, Buitreraptor, Unenlagia,* and *Neuequenraptor* is represented by a scar-like structure, that appears to be uniquely shared by these taxa. On this basis, we modified present character with the addition of the state “2”.

**Character 184:** Anterior surface of femur proximal to medial distal condyle

0: without longitudinal crest

1: crest present extending proximally from medial condyle on anterior surface of shaft

Comment. As seen in the holotype and referred specimens of *Buitreraptor*, the distal end of the femur does not show a longitudinal crest along the medial surface. We rescore this character from “?” to “0” in *Buitreraptor*

**Character 185:** Popliteal fossa between ends of femur

0: open distally

1: closed off distally by contact between distal condyles

**Comments.** The distal end of the femur in *Buitreraptor* shows a popliteal fossa that is distally opened, and thus we changed the character state from “?” to “0”.

**Character 187:** Medial surface of proximal end of fibula

0: concave along long axis

1: flat

**Comment.** Based on Novas et al (2017), the medial surface of the proximal end of the fibula is nearly flat in Buitreraptor, and thus we rescore the character from “?” to “1” in *Buitreaptor*.

**Character 188:** Deep oval fossa on medial surface of fibula near proximal end

0: absent

1: present

**Comment.** As indicated above, the medial surface of the proximal en of the fibula in *Buitreraptor* is flat, and thus, this character was rescored from “?” to “0”.

**Character 190:** Tibia, cnemial crest(s)

0: lateral crest only

1: lateral and anterior crests developed (1)

**Comment.** As seen in the holotype and referred specimens of *Buitreraptor* (Makovicky et al., 2005; Gianechini; 2015; Novas et al., 2017), the proximal end of the tibia lacks an accesory anterior cnemial crest, and thus the character is rescored from “?” to “0” in *Buitreraptor*.

**Character 193:** Calcaneum and astragalus ORDERED

0: unfused to each other or tibia in adult

1: fused to each other, unfused to tibia

2: completely fused to each other and tibia

**Comment.**  As indicated by the referred specimen of *Buitreraptor* (MPCA-238; Gianechini, 2015), the astragalus and calcaneum are fused between each other but not the tibia, we rescore this character from “2” to “1”. In the case of *Neuquenraptor*/*Unenlagia*, the ventral surface of the astragalocalcaneum is badly damaged and thus the condition is uncertain, we rescore it from “1” to “?”.

**Character 194:** Distal tarsals

0: separate, not fused to metatarsals

1: fuses to metatarsal

**Comment.** This character was changed from “1” to “0” in *Rahonavis*. As mentioned in its original description, *Rahonavis* preserves only one free distal tarsal that is not fused to the metatarsals, as in some specimens of *Archeopteryx* (Forster et al., 1998).

**Character 195:** Metatarsals ORDERED

0: not coossified

1: coossification of metatarsals begins proximally

2: metatarsals fuse to each other proximally and distally

3: extreme distal fusion, distal vascular foramen closed

**Comment.** We rescore this character from “?” to “0” in *Neuquenraptor/Unenlagia*.

**Character 196:** Distal end of metatarsal II

0: smooth, not ginglymoid

1: with developed ginglymus

**Comment.** After Currie and Paulina Carabajal (2012) we rescore this character from “?” to “1” in *Austroraptor*.

**Character 197:** Distal end of metatarsal III

0: smooth, not ginglymoid

1: with developed ginglymus

**Comment.** After Currie and Paulina Carabajal (2012) we rescore this character from “?” to “1” in *Austroraptor*.

**Character 198:** Metatarsal III proximal shaft

0: prominently exposed between metatarsal II and metatarsal IV along entire

metapodium

1: metatarsal III proximal shaft constricted and much narrower than either II or IV, but

still exposed along most of metapodium, subarctometatarsal

2: very pinched, not exposed along proximal section of metapodium, arctometatarsal

3: proximal part of metatarsal III lost

**Comment.** Based on the holotype (Novas et al., 2009) and referred specimen (Currie and Paulina Carabajal 2012) we rescore this character from “1/2” to “1” in *Austroraptor*.

**Character 204:** Neural spines on posterior dorsal vertebrae in lateral view

0: rectangular or square

1: anteroposteriorly expanded distally, fan shaped

**Comment.** As indicated by Novas et al (2017) the neural spines of posterior dorsal vertebrae of *Buitreraptor* are sub-rectangular in contour, and thus, we rescore this character from “?” to “0”.

**Character 205:** Shaft diameter of manual phalanx I-1

0: less than shaft diameter of radius.

1: greater than shaft diameter of radius.

**Comment.** Based on available specimens of *Buitreraptor* and *Austroraptor* we rescore this character from “?” to “0” in both taxa.

**Character 208:** Distal articular ends of metacarpals I + II

0: ginglymoid

1: rounded, smooth

2: II ginglymoid and metacarpal I shelf

**Comment.** Based on available specimens of *Buitreraptor* (Novas et al., 2017) we rescore this character from “?” to “0”.

**Character 209:** Radius and ulna

0: well separated

1: with distinct adherence or syndesmosis distally

Based on available specimens of *Austroraptor* (Gianechini, 2015) we rescore this character from “?” to “0”.

**Character 216:** Posterior edge of coracoid

0: not or only shallowly indented below glenoid

1: deeply notched just ventral to glenoid, glenoid lip everted

**Comment.** As indicated by the coracoidal morphology of a recently described specimen of *Buitreraptor* (MPCN-Pv-598) we rescore this character from “?” to “0”.

**Character 218:** Flange on supraglenoid buttress on scapula (Nicholls and Russell,

1985)

0: absent

1: present

**Comment.** As indicated by the scapula of a recently described specimen of *Buitreraptor* (MPCN-Pv-598) we rescore this character from “?” to “0”.

**Character 223:** Flexor heel on phalanx II-2

0: small and asymmetrically developed only on medial side of vertical ridge subdividing proximal articulation

1: heel long and lobate, with extension of midline ridge extending onto its dorsal surface

**Comment.** Based on the holotype (Novas et al., 2009) and referred specimen (Currie and Paulina Carabajal 2012) we rescore this character from “?” to “0” in *Austroraptor*.

**Character 226:** Lateral face of pubic shaft

0: smooth

1: with prominent lateral tubercle about halfway down the shaft

**Comment.** Based on the holotype (Novas et al., 2009) specimen of *Austroraptor* we rescore this character from “?” to “0”.

**Character 234:** Accessory antorbital (maxillary) fenestra recessed within a shallow, caudally or caudodorsally open fossa, which is itself located within the maxillary

antorbital fossa

0: absent

1: present

**Comment.** Based on the holotype (Novas et al., 2009) specimen of *Austroraptor* we rescore this character from “?” to “1”.

Additionally on the basis of personal inspection of the holotype cranium of *Buitreraptor* we were no able to dicern the condition of the accesory antorbital fenestra and fossa, and thus we change the score from “0” to “?”.

**Character 242:** Anterior and posterior denticles of teeth

0: not significantly different in size

1: anterior denticles, when present, significantly smaller than posterior denticles

**Comment.** Changed from “?” to “-“ in *Buitreraptor* and *Austroraptor.*

**Character 243:** Maxillary teeth

0: almost perpendicular to jaw margin

1: inclined strongly posteroventrally

**Comment.** We changed the score from “?” to “0” in *Buitreraptor.*

**Character 252:** Surangular, anteroventral extension divides external mandibular

fenestra by contacting angular anteriorly

0: absent

1: present

**Comment**. Only *Allosaurus* is codified as state “1”, uninformative character.

**Character 260:** Pleurocoels in dorsal vertebrae ORDERED

0: absent

1: present in anterior dorsals

2: present in all dorsals

**Comment.** Among unenlagiids, *Buitreraptor* is unique in lacking any signs of pleurocoels on its dorsal vertebrae (Novas et al., 2017), and thus we rescore the character from “1” to “0”.

**Character 262:** Humerus in lateral view

0: sigmoidal

1: straight

**Comment.** Based on available specimens we rescore this character from “0” to “1” in *Buitreraptor* and *Neuquenraptor*/*Unenlagia.*

**Character 263:** Radius

0: more than half the length of humerus

1: less than half the length of humerus

**Comment.** Based on referred specimen of *Austroraptor* (Currie and Paulina Carabajal, 2012) we changed the score from “?” to “0”.

**Character 267:** Facial margin ORDERED

0: primarily formed by the maxilla, with the maxillary process of the premaxilla restricted to the anterior tip

1: maxillary process of the premaxilla extending ½ facial margin

2: maxillary process of the premaxilla extending more than ½ of facial margin

**Comment.** The premaxilla is unknown in all *Austroraptor* specimens, and thus we rescore this character from “0” to “?”.

**Character 294:** Quadrate, cluster of pneumatic foramina on posterior surface of the tip

of dorsal process

0: absent

1: present

**Comment**. No taxon is codified as state “1”, uninformative character.

**Character 301:** Mandibular symphysis, symphyseal foramen/foramina

0: single

1: paired

**Comment**. No taxon is codified as state “0”, uninformative character.

**Character 304:** Anterior external mandibular fenestra

0: absent

1: present

**Comment**. No taxon is codified as state “1”, uninformative character.

**Character 310:** Thoracic vertebrae, centra, length, and midpoint width

0: approximately equal in length and midpoint width

1: length markedly greater than midpoint width

**Comment.** Available *Austroraptor* vertebrae, indicated that the vertebral centra are approximately equal in length and midpoint width (an even wider than long), and thus we rescore it from “?” to “0”.

**Character 314:** Anterior free caudals prior to transition point; length of transverse

processes

0: subequal to width of centrum

1: significantly shorter than centrum width

**Comment.** Changed from “0,1” to “0” in *Buitreraptor* based on new information by Motta et al (2017).

**Character 315:** Distal caudals

0: unfused

1: fused

**Comment.** Available *Austroraptor* distal caudal vertebrae, indicated that the vertebrae remain unfused, and thus we rescore it from “?” to “0”.

**Character 316:** Fused distal caudals, morphology ORDERED

0: fused element length equal or greater than 4 free caudal vertebrae

1: length less than 4 caudal vertebrae

2: less than 2 caudal vertebrae in length

**Comment.** Changed from “?” to ”–“ in *Buitreraptor* and *Austroraptor*.

**Character 317:** Gastralia

0: present

1: absent

**Comment.** Changed from “?” to “0” in *Buitreraptor* and *Neuquenraptor/Unenlagia* and *Austroraptor* (Gianechini, 2015; Novas et al., 2017; present contribution)*.*

**Character 326:** Clavicles

0: fused

1: unfused

**Comment**. No taxon is codified as state “1”, uninformative character.

**Character 334:** Coracoid, dorsal surface (= posterior surface of basal maniraptoran

theropods)

0: strongly concave

1: flat to convex

**Comment.** Based on Novas et al (2017) re rescore this character from “?” to “0”.

**Character 344:** Scapula, posterior end

0: wider or approximately the same width as proximal dorsoventral shaft width

1: tapering distally

**Comment.** Based on recently described specimen (MPCN-Pv-598) by Novas et al (2017) we rescore this character from “?” to “1” for *Buitreraptor*.

**Character 348:** Humerus and ulna, length ORDERED

0: humerus longer than ulna

1: ulna and humerus approximately the same length

2: ulna significantly longer than humerus

**Comment.** Based on available specimens of Austroraptor (Novas et al., 2009; Currie and Paulina Carabajal, 2012), we rescore this character rom “?” to “0” for *Austroraptor*.

**Character 352:** Humerus, capital incisure

0: an open groove

1: closed by tubercle associated with a muscle insertion just distal to humeral head

**Comment.** Changed from “?” to “–“ in *Buitreraptor, Neuquenraptor/Unenlagia* and *Austroraptor.*

**Character 353:** Humerus, anterior surface, well-developed fossa on midline making proximal articular surface appear V-shaped in proximal view

0: absent

1: present

**Comment.** Based on available specimens we rescore this character from “0“ to “1” in *Buitreraptor*, *Neuquenraptor*/*Unenlagia* and *Austroraptor*.

**Character 355:** Humerus, deltopectoral crest

0: projected dorsally (in line with the long axis of humeral head)

1: projected anteriorly

**Comment.** Changed from “1” to “0” in *Austroraptor* (As it was considered as an autapomorphic trait that distinguishes *Austroraptor* from the remaining unenlagiids)

**Character 359:** Humerus, bicipital crest, pit-shaped scar/fossa for muscular attachment on anterodistal, distal or posterodistal surface of crest

0: absent

1: present

**Comment.** As this character is only present in highly derived birds we changed the scores from “?” to “0” in *Buitreraptor*, *Neuquenraptor*/*Unenlagia* and *Austroraptor*.

**Character 360:** Humerus, bicipital crest, pit-shaped fossa for muscular attachment

0: anterodistal on bicipital crest

1: directly ventrodistal at tip of bicipital crest

2: posterodistal, variably developed as a fossa

**Comment.** As this character is only present in highly derived birds we changed the scores from “?” to “0” in *Buitreraptor*, *Neuquenraptor*/*Unenlagia* and *Austroraptor*.

**Character 361:** Humerus, bicipital crest ORDERED

0: little or no anterior projection

1: developed as an anterior projection relative to shaft surface in ventral view

2: hypertrophied, rounded tumescence

**Comment.** Based on available specimens (Novas et al., 2009) we rescore this character from “?” to “0” in *Austroraptor.*

**Character 364:** Humerus, long axis of dorsal condyle

0: at low angle to humeral axis, proximodistally orientated

1: at high angle to humeral axis, almost transversely orientated

**Comment.** Changed from “0” to “1” in *Buitreraptor*, based on the well-preserved distal end of humerus described by Gianechini (2015). On the other hand, due to incomplete preservation, *Neuquenraptor*/*Unenlagia* this character is scored as “?”.

**Character 365:** Humerus, distal condyles

0: subround, bulbous

1: weakly defined, ‘‘straplike’’

**Comment.** Because of poor preservation,we re-scored“0” to “?” in *Neuquenraptor*/*Unenlagia*. In the case of *Buitreraptor* the character is re-scored from “0” to “1” because both distal condyles are strap-like in contour (Gianechini, 2015).

**Character 368:** Humerus, brachial fossa

0: absent

1: present, developed as a flat scar or as a impressed fossa

**Comment**. A well-developed brachial fossa is present in the distal end of the humerus of *Buitreraptor* (scored as absent “0” by Gianechini et al., 2017), *Neuquenraptor*/*Unenlagia* (the distal end of the humerus of “*U. paynemili*” is preserved enough to observe a well-developed brachial fossa, and thus is re-scored from “0” to “1”) and *Austroraptor* (the distal end of the humerus of both holotype and specimen described by Currie and Paulian Carabajal (2012) are preserved enough to show a well-developed brachial fossa, and thus *Austroraptor* is re-scored from “0” to “1”).

**Character 369:** Humerus, ventral condyle

0: length of long axis of condyle less than the same measure of the dorsal condyle

1: same or greater than same measure of the dorsal condyle

**Comment**. The distal condyles in *Buitreraptor* and *Austroraptor* are not preserved enough, and thus this character is re-scored from “0” to “?”.

**Character 370:** Humerus, demarcation of muscle origins (e.g., m. extensor metacarpi

radialis in Aves) on the dorsal edge of the distal humerus

0: no indication of origin as a scar, a pit, or a tubercle

1: indication as a pit-shaped scar or as a variably projected scar-bearing tubercle or facet

**Comment**. The distal end of humerus in *Buitreraptor, Neuquenraptor*/*Unenlagia* and *Austroraptor* are not preserved enough, and thus this character is re-scored from “0” to “?”.

**Character 371:** Humerus, distal end, posterior surface, groove for passage of m.

scapulotriceps

0: absent

1: present

**Comment**. Personal inspection of *Buitreraptor* holotype (MPCA 245) indicates well developed groove for passage of *m. scapulotriceps* and *m. humerotricipitalis* groove, and thus characters 371 and 372 are re-scored from “0” to “1”. In the case of *Neuquenraptor*/*Unenlagia* and *Austroraptor* the distal humerus on these taxa is not preserved enough to allow recognition of absence or presence of such grooves. In consequence are re-scored from “0” to “?”.

**Character 372:** Humerus, m. humerotricipitalis groove

0: absent

1: present as a ventral depression contiguous with the olecranon fossa

**Comments**. See comments under character 371.

**Character 373:** Ulna, cotylae

0: dorsoventrally adjacent

1: widely separated by a deep groove

**Comment**. No taxon is codified as state “1”, uninformative character.

**Character 374:** Ulna, dorsal cotyla convex

0: absent

1: present

**Comment**. No taxon is codified as state “1”, uninformative character.

**Character 383:** Metacarpal III, anteroposterior diameter as a percent of same

dimension of metacarpal II

0: approximately equal or greater than 50%

1: less than 50%

**Comment.** Based on recently described specimen of *Buitreraptor* we rescore this character from “?” to “1”.

**Character 385:** Metacarpal I, anterior surface

0: roughly hourglass shaped proximally, at least moderately expanded anteroposteriorly,

and constricted just before flare of articulation for phalanx 1

1: anterior surface broadly convex

**Comment. .** Based on recently described specimen of *Buitreraptor* we rescore this character from “?” to “0”. Additionally newly described specimen of *Austroraptor* allow to rescore this character from “?” to “0”.

**Character 386:** Pisiform process

0: absent

1: present

**Comment.** Based on recently described specimen of *Buitreraptor* (Novas et al., 2017) we rescore this character from “?” to “0”.

**Character 387:** Carpometacarpus, ventral surface, supratrochlear fossa deeply excavating proximal surface of pisiform process

0: absent

1: present

**Comment.** Changed from “0” to “–“ in *Buitreraptor*.

**Character 388:** Intermetacarpal space (between metacarpals II and III)

0: reaches proximally as far as the distal end of metacarpal I

1: terminates distal to end of metacarpal I

**Comment.** Based on recently described specimen of *Buitreraptor* (Novas et al., 2017) we rescore this character from “?” to “1”.

**Character 389:** Carpometacarpus, distal end, metacarpals II and III, articular surfaces for digits

0: metacarpal II subequal or surpasses metacarpal III in distal extent

1: metacarpal III extends further

**Comment.** Based on recently described specimen of *Buitreraptor* (Novas et al., 2017) we rescore this character from “?” to “0”.

**Character 390:** Intermetacarpal process or tubercle ORDERED

0: absent

1: present as scar

2: present as tubercle or flange

**Comment.** Based on recently described specimen of *Buitreraptor* (Novas et al., 2017) we rescore this character from “?” to “0”.

**Character 391:** Manual digit II, phalanx 1

0: subcylindrical to subtriangular

1: strongly dorsoventrally compressed, flat caudal surface

**Comment.** Based on recently described specimen of *Buitreraptor* (Novas et al., 2017) we rescore this character from “?” to “0”.

**Character 393:** Manual digit II, phalanx 2, internal index process on posterodistal edge

0: absent

1: present

**Comment**. Based on Novas et al (2017) we rescore Buitreraptor from “?” to “0”. Additionally, no taxon is codified as state “1”, and thus this is an uninformative character.

**Character 397:** Laterally projected process on ischiadic peduncle (antitrochanter)

0: directly posterior to acetabulum

1: posterodorsal to acetabulum

**Comment.** Based on recently described specimen of *Buitreraptor* (Novas et al., 2017) we rescore this character from “?” to “0”.

**Character 398:** Ilium, preacetabular pectineal process (Baumel and Witmer, 1993)

ORDERED

0: absent

1: present as a small flange

2: present as a well-projected flange

**Comment.** Based on recently described specimen of *Buitreraptor* (Novas et al., 2017) we rescore this character from “?” to “0”.

**Character 399:** Preacetabular ilium

0: approach on midline, open, or cartilaginous connection

1: coossified, dorsal closure of ‘‘iliosynsacral canals’

**Comment.** Based on available specimens of *Buitreraptor* and *Neuquenraptor*/*Unenlagia* we rescore this character from “?” to “0” in both taxa.

**Character 400:** Preacetabular ilium extends anterior to first sacral vertebrae

0: no free ribs overlapped

1: one or more ribs overlapped

**Comment.** Based on recently described specimen of *Buitreraptor* (Novas et al., 2017) we rescore this character from “?” to “0”.

**Character 403:** Ilium, m. cuppedicus fossa as broad, mediolaterally oriented surface

directly anteroventral to acetabulum

0: present

1: surface absent, insertion variably marked by a small entirely lateral fossa anterior to

acetabulum

**Comment.** Based on recently described specimen of *Buitreraptor* (Novas et al., 2017) we rescore this character from “?” to “0”.

**Character 404:** Pubis

0: suboval in cross section

1: compressed mediolaterally

**Comment.** Based on recently described specimen of *Buitreraptor* (Novas et al., 2017) we rescore this character from “?” to “0”.

**Character 405:** Pubes, distal contact

0: contacting, variably coossified into symphysis

1: noncontacting

**Comment.** Based on recently described specimen of *Buitreraptor* (Novas et al., 2017) we rescore this character from “?” to “0”.

**Character 407:** Femur, patellar groove

0: absent

1: present

**Comment.** Based on recently described specimen of *Buitreraptor* (Novas et al., 2017) we rescore this character from “?” to “0”.

**Character 409:** Femur, posterior projection of the lateral border of the distal end,

continuous with lateral condyle

0: absent

1: present

**Comment**. No taxon is codified as state “1”, uninformative character.

**Character 410:** Laterally projected fibular trochlea ORDERED

0: absent

1: present, developed as small notch

2: a shelflike projection

**Comment.** Based on recently described specimen of *Buitreraptor* (Novas et al., 2017) we rescore this character from “?” to “1” in *Buitreraptor*. Additionally, based on Brissón Egli et al (2017) and the present studie, we rescore *Neuquenraptor*/*Unenlagia* from “?” to “1”.

**Character 420:** Metatarsal III

0: proximally in plane with II and IV

1: proximally displaced plantarly, relative to metatarsals II and IV

**Comment.**Based on recently described specimen of *Buitreraptor* (Novas et al., 2017) we rescore this character from “0” to “1” in *Buitreraptor*. Additionally, based on Brissón Egli et al (2017) and the present studie, we rescore *Neuquenraptor*/*Unenlagia* from “0” to “1”.

**Character 421:** Tarsometatarsus, inter cotylar eminence

0: absent

1: well developed, globose

**Comment.** Based on recently described specimen of *Buitreraptor* (Novas et al., 2017) we rescore this character from “?” to “0”.

**Character 428:** Distal vascular foramen

0: simple, with one exit

1: forked, two exits (plantar and distal) between metatarsals III and IV.

**Comment.** From “?” to “–“ in *Buitreraptor*, *Neuquenraptor*/*Unenlagia* and *Austroraptor*.

**Character 436:** Combined length of metacarpal

I plus phalanx I-1

0: greater than length of metacarpal II

1: equal to or less than length of metacarpal II

**Comment.** Based on recently described specimen of *Buitreraptor* (Novas et al., 2017) we rescore this character from “?” to “1”.

**Character 437:** Metacarpal III

0: straight

1: bowed

**Comment.** Based on recently described specimen of *Buitreraptor* (Novas et al., 2017) we rescore this character from “?” to “1”.

**Character 438:** Metatarsal I

0: distal end of trochlea proximally placed relative to other metatarsals

1: inline distally with others

Based on recently described specimen of *Buitreraptor* (Novas et al., 2017) we rescore this character from “?” to “0” in *Buitreraptor*. Additionally, based on Brissón Egli et al (2017) and the present studie, we rescore *Neuquenraptor*/*Unenlagia* from “?” to “0”.

**Character 439:** Metatarsal I

0: present

1: absent

**Comment.** Based on recently described specimen of *Buitreraptor* (Novas et al., 2017) we rescore this character from “?” to “1”.

**Character 446:** V-shaped opening between basal tubera remnants

0: absent

1: present

**Comment**. Only IGM-100/112 is codified as state “1”, uninformative character.

**Character 450:** Ulna, size of proximal cotylae

0: unequal, lateral (dorsal in birds) smaller

1: equal

**Comment.** Based on the holotype specimen of *Buitreraptor* (Gianechini, 2015) we rescore this character from “1” to “0”.

**Character 452:** Filamentous integumentary structures (stage 1 feathers)

0: absent

1: present

**Comment**. Only *Erlikosaurus* is codified as state “0”, uninformative character.

**Character 459:** Relative ventral extension of pubic versus ischiadic peduncles

0: equal

1: pubic peduncle extends farther ventrally

**Comment.** Based on recently described specimen of *Buitreraptor* (Novas et al., 2017) we rescore this character from “?” to “1”.

**Character 465:** (Nesbitt et al., 2009) Hypocledium

0: rounded

1: keeled

**Comment.** Based on recently described specimen of *Buitreraptor* (Novas et al., 2017) we rescore this character from “?” to “0”.

**Character 483:** Location of the anteroventral process of ilium

0: anteriorly located, close to the anterior end of the bone

1: posteriorly located, significantly away from the anterior end

**Comment.** Based on recently described specimen of *Buitreraptor* (Novas et al., 2017) we rescore this character from “?” to “1”.

**Character 488:** Angle between the posterior border of the pubic shaft and the dorsal

border of the pubic boot

0: less than 90°

1: greater than 90°

**Comment.** Based on recently described specimen of *Buitreraptor* (Novas et al., 2017) we rescore this character from “?” to “0”. Additionally we rescore *Neuquenraptor*/*Unenlagia* from “0,1” to “0” based on available information (Gianechini, 2015).

**Character 489:** Dorsal surface of the acetabulum

0: perpendicular with the lateral surface of the iliac blade, so the acetabulum is totally

open

1: dorsal surface of the acetabulum ventrally and medially inclined, so the acetabulum

tends to be obliterated

**Comment**. Based on available specimens (Novas, 2004; Gianechini, 2015; Novas et al., 2017) we rescore this character from “0” to “1” in *Buitreraptor* and “0,1” to “1” in *Neuquenraptor*/*Unenlagia*.

**Character 490:** Anteroposterior extension of the pubic peduncle

0: less than the anteroposterior extension of the acetabulum

1: between 1 and 1.5 the anteroposterior extension of the acetabulum

2: > 1.5 the anteroposterior extension of the acetabulum

Based on recently described specimen of *Buitreraptor* (Novas et al., 2017) we rescore this character from “?” to “1”.

**S3. Data matrix**

Allosaurus_fragilis ?1100?00000001000110010001000001110110020??00000000100010000000000100010000000000101010010000000100101000000000001000000?01????000000000000000?00000100000010000000100000000000?1000001100000010000000000000000000100000000000?0?000?000100001000000001000010000210100000000002000000000?0000??000000?00000???0000000000000?0????????0000020?00?0000010001000?0?0010000?0000000000000?0???10?01000??0000000?000?000002000000000000?00000?00?0000?0000002000?0000?10??001000000[01]0?00000000000000000?000000100

Sinraptor_dongi ?1100??00?00010001000000010?0000010110020?00?000000000010000?00000100?1000000000010101001000000010010100000000000??????????1?10?0?0??00??0??????000010000?010??00001000000000?001000000?00000010000000000000?000?000?00?000000?0?000?00010000111100010???????0002101???00000000000?00000?0000??000000?000000??00000001000???00200??00?????2????????????0010???????????????????????????????????1??????0??000??000001002000000000000000000?00?00??0???0002000???001?0??0010000????????????1?10000?0?0000000010

Ornitholestes_hermanni ?0100??0?0?00?1???0?010?01110001?100001?0??1000001?01011????0000001000?0000010?00101001?????011?0101110000??000?0010??1???????????????01?00?????????00001??1?0?0[01]00100000001??0?1???????0????????00?00????00000?0010?00?0?0000?0?0000?0000000??01?0??0000000?0002?111000000000?0???00000?0?00???00000?00000???00000001000[01]0?????????????????????????????????0?0?0010000?000000000000??0??0????1000??0?00?00?000?00000?0000?????????0000?000?000??00?0?????0?000??0???0001?0?????????00001??0?1??0?00000?0?10

Dilong_paradoxus ?0100?0000000?100100010??1010000100110100001000000?0000??????0000000??0000000000010101110001?0?0100??1?0??????0??012[01]0??????????00000011000????0000?00001??10??0010100?0?0?010000000000?00??00010?00100?0000?00000?0?00000?000?0?0010000000000011100?000111???00001010?000000??????000?0?000???000001?100000???000?00?00????0?????????????20?00?0?0?000001000?0?0?1000???000000000??0?0??0????1000??0000000???0?00?00200000000000000000???????0000?0000?0?10000???010000000?????????0000?00011?1?2?000?0??10

Tarbosaurus_baatar ??????????????????0???????????????????1????????????????????????????????????????????????????????????????????????????????????????????????????0?????????????????????????????????????????????????????????2????????????????????????????????0???????????????11111011112??2011000000000??0??????0000???000???01????????00????????????????????????????????????????????????????????????????????????????????????????????????????????????????????????????000000??02000??0001?0??00100000???????000?00000000??0000000010

Gorgosaurus_libratus ?1000?00?0000??0?100000101010000000110120?0211000001000000?0000000100?101000000001010110100000??0001010000001000000010000?10001000000001000000?01000103100010000000101101100000010010000000?000100000200000001000000000000?000?0?0010000100000011000?0011110111121?20110000000000?00000000000???00001?0?0000???000000?00??0?0???????????0020010?0000010001101?0?0010000?000000000000010??0?????000???00??00?0000000002100000000000000000?00??0000000??02000??000??0??00100000110?00?000???1??1?0???00????0?0

Daspletosaurus ?1100?00000001002?00000101010000?001101201021100000100010000000000100?100000000001010110???000???001?10??0????000??0????????????000000010000???010001031000100000001011011000000??0100?0000??001000002000000010000000000000000?0?0010?00100000011000?0111110111121?201100000000???00000000000???00001?0?0000??0000000?00??0?0???????????0020010?0000010001101?0?0010000?000000000000010??0?????000???00??00?0000000002100000000000000000?00??0000000??02000??0001?0??00100000110?00?000?00001100???00??????0

Eotyrannus_lengi ????????????????????000?0???0??????100???????????0???????????00??010???????0000001010?1?????????????????????????????????????????00000001?0?0?????????????????????????????????????????????????0????0??????0????0?00????00?0?????0??????????00??0??00??0?11?????10?????1?0000?????????????????0??0?0000?????00??????00???????????????????????0000?0?????000?0?0?????1000???000000?????01?????????00??????????????????????????????????????????????0????????????????????????????????????????????????????????????

Tyrannosaurus_rex ?1000?01100001002100000101010000000110120102110000010001?0000000001001101000000001010110100000?000010100000010000?001000??1?????000000010000????100010310001000000010110110000001?010010000?0001000002000000010000000000000000?0?0010100100000011000?01111101111210201100000000000000000?0000??0000010010000??00000001000[01]0?0????????0000020010?0000010001101?0?0010000?000000000000010??0?????000???00??00?0000000002100000000000000000000?00000000??02000??0001?0??00100000110?0000000001001000?0000000010

Albertosaurus_sacrophagus ?1000?00?0000?002?0?000101?100?0000110120?021?0?000?00000000?0??????0?1??00000000101011?????0????001?10??0????000??0????????????000000010000???010001031000100000001011011000000??0?00?0000??00100000200000001000000000000?000?0?0010?00100000011000?00111101111210201100000000???00000000000??00000100??000???000000?00??0?0???????????0?20010?0000010001101?0?0010000?000000000000010??0?????000???00??00?0000000002100000000000000000?00??0000000??02000??000??0??00100000110?00?00?????????????????????0

Coelurus_fragilis ???????????????????????????????????????????????????????????????????????????????????????0??010010000111000?????0?000?????????????0?0??0?10001????0??????????????????????????01100?000000?0?0?00110?0?0????0?00??00???0??????????0?0????0???????????????????????????11100????????????????????????????????????????????00100??????????????????2????????????????00?0?0010000?000000000000010000???0????0???0000?????????002000000000000??000???????????0000???????????0??????0???????????0???101011?100??????????

Proceratosaurus_bradleyi ??1?0?????????????00010101110000?00??????????0??00???????????000?0000?00?00000000101011??????????????????????????????????????????????????????????????????????????????????????????????????????????????????????00??0????0?0??????????????00000010?1?00?00?00????0?2??????00?000???0??????00???????????0?1???0?????00???????????????????????????????????????????????????????????????????????????????????????????????????????????????????????????????????????????????????0????????????????0????????????????????0

Pelecanimimus_polyodon ?01??????1????????2?00???1100?????????0??0????????????????????00?0000??????000211??0001????????????????????????????????????0?00????2?????00??0?1010?????????????????????????????????????????????????????????001110????0?????0?????0????000?0??0?1?0???????????00?0?0?10???0?0??????????0?0?????????????????????0???????????????????????????0????0?0???????????????????????????????????????1??0000???00000??????????????????????????????????????0??000???????????0?????0??0????????????00????????????0??????0

Archaeornithomimus_asiaticus ????????????????????????????????????????????????????????????????????????????????????????00?101100001010001?100000000?0??????????01?200?20000?0100[12]0???000?110000101000?00?001001000001?00010001000000?0?00001?11??10??1?1??00?00?001000????????????????????????????????????????????????????????????????????????????00100?[01]0???????????????20?00?00000?0?1??01?0?0010000?0000000000000?0000???0?0000??00??00?????00?002000000000000?0000??00?0?00?000?????????????0??????0???????????????100011??0?0??00000?-

Shenzhousaurus_orientalis ???0??????????????210001?1000??1???000??00?000?0???????????0?00000000??0?0?1?12?0??1????????????0????1???0???00000??[012]0?????????????????????????0010000001??110?0000100?000000100??00001?0??????????????????0??1??1?0011?????00???0010??00000010?????????0??0??00???0???00?000????????????????????00?????0??????0?0?0?10?0?0?0?????????????????????????????????????????????????????????????????0?????0?00000?00000?0002?000?????????????????????????00?????????????????00?00??????????00?10?0????000?000001?-

Ornithomimus_edmontonicus ?0101?110?101?10102100010101010110000000000000001000000??????000000000101001?1???????-?001?10110000101000101000000001001001?????01120002000000?10200100000011000010100100000010010000011000100010000020??00?011111110121110000?0?0010000000000001?????0?0100?00000001100?00000?????????0?0?10???00000?010??????0000001000[01]0?0??????????????0??0?0?0?0?00?1001?0?00?000???0000000??00??????1??00000??0000020?000?000002000000000000?0??0?????0??0??000?1???????0???0??0000000????????000?100????0?0???????0?-

Anserimimus_planinychus ????????????????????????????????????????????????????????????????????????????????????????????????????0?????????????????0??????????1???0?2????00?10200100000011000010100????000?001????????????????00002???00????11??10??1?1??00?0?001000????????????????????????????????????????????????????????????????????????????????????????????????????0????????0??0?????????????????????????????????????010000?00000?????????????????????????10000??02??0??0??00?1????????????????????????????????????????1?0?????????-

Harpymimus_okladnikovi ?0????????????????2?0?????????????????????????????????????????0??00?00????????200??1?0?????????????????0?0?????????????????????????????2?0000000010?10??0????1??010?????00????0?????????????????0000000???0?001011????1?0???00?0?0???000??0000??1?0??????????000??11?10000000????????????0??????????????0000??00?0000?000[01]0????????????????????????????00??01?0?0010000?000000000000???1?010?000000?0000000?0?0000?00?????00000000?00000?00??00??0000?1????????00??????000????????????????0????0?0?????????-

Garudimimus_brevipes ?010????01101?????2?00010101000??000?00000?0?000?0??0001??1?0??0??00?0?0?0?1?1???????-???????????????1???1??0?????????????????????????????????????????0?0???1???0?0????????0??0?1???????0???????000000000?0??01??1?1??2?1?0?00?0?0??0000000000000???????0000?0000010???00?0000?001?00000?0000??0000010110000??00000001000???0????????????????????????????????????????????????????????????????????????????00?0000000002000000010000000000003?010?0????0000???000???0??001000????????0000?1??011??0?000000000-

Gallimimus_bullatus ?0101?110110101010210001011?01?1100000000000000010000001?0100000000000100001?1???????-?0011101100001010001?100000000100100??????0112000200000??10100100000011000010100100000010010000011000100010000020??000001111110121110000?0?0010000000000001??????00100?000000211000?0000[01]001000000?0000???00000??10200??10000001000[01]0?0?????????????20?00?0000000011001?0?0010000?0000000?0?000?0???1??00000??0000020?0?0?00000200000000000001000?000?01000000??1002??0000??0??00000?0????????000?10001110000?0000?00-

Struthiomimus_altus ?0101?110??0??1010210001011101?1100000000000000010??0001?01??000100000100001?1?????????001?10110000101000101000000001001001?????01120002000000?10100100000011000010100100000000010000011000100010000020??000011111110121110000?0?0010000000000001??????00????0000??2110????0???????????0?0?1????000???0?0?00???00?000?000[01]0?0?????????????20??0?0?000?0001101?0?0010000??00000000000??0???0??00000??00000000000000000200?00000000000000??00?020000000?1002??0??00????0?00?00?????????0???00011?0000?00?000?-

Huaxiagnathus_orientalis ?01?0?????????????0001???1???0?????00??0?????????????????????00?0010???????00010?1010?00??0???1????????0??????00???02100010????000000000?00??010000000020?0??000000100?000011?0???0??????0??0?010000000?0?011??000????00?0??00?0?0010?0000000???1?00????0?????000???100???0000?????????00???????????????????????0000?1?0?[01]0?0????????0000020??0?0?0?0?000100??????10?0???0???????????????????010????000??00?0???00000??????000?0??00??0??0????000000000????????000????00000?0?00??10010?100011?????0000?00?0

Sinosauropteryx_prima 001?0?????????????0001???1???0?????0000??????00?10???????????00??01????????0001001010?00??01??100????1?0?0????00?1100100010?????00000000?10??010000?00020??????0000100?000?11?0?1?00?0??000?0?01000000000?011??0000??000?0??00?0?000??00000000??1?00?00??????000????10000?000????????????0?0???????0101????????000?0???00[01]0?0??????????????0??0?0?00???0??00???????0?0???00?00????????????1??0000???0000000?0?000??0?2?????00??0??00??00?0???0000000000????????000?10???000?????????0???100011?0000000?100?0

Compsognathus_longipes ?01?0??????????????0010??1??00?0?00000????011????000????0????00000100?1?0?000010010101000?01??00[01]0???1?0?0???000?010110001??????0?000000?10??????00?00?????????0000100?000?01?0??????????00?0001000000000001100?00????0?0???00?0?0010000000000001?00000000?00?000?1010000?0000??0?0??0?0????0???0000?????1?0??000000?1000[01]0?0????????00?0?20??0?0?0?0?00?100????0?1000???0????0??????????????000????0?0??00????000?00??????00??0??000?00000?00000000000????????0?????000000????????00?0?100011010?0100????10

Juravenator_starki ?011??????????????00000??11000?????00021?0?00?0?????00???????0000010???0???000100101??00??0???????????0???????00??100?0?01?????00?000000000????0000000000?01100???????????????????0?0???00??????1?0??000000?10?000?1??0??0??00?0??????000000000?1?00?0?000???0000???11000?000??????????0????????????????0??????00000??00??0?0????????000002??00???????000100000?0010000??000?000?000???0?0????100???0000?????00?000??2??00??????000??0?00?0?00000000000????????00??????0?0000000?10?0????0??110?????0??????0

Haplocheirus_sollers ?0011??0?010?????01101110111100??10??20?00???1000??0101?00110000101101101000?011?100??00??10??0?0111101??0??0001?0??20??0???????100?100??110?0?00010???1???00?100102000010?011000?10000000???0??0000000??00?11100011100?0001?0???0010?00000001000????00000?0??000?10??00000000?????????0????????????100?0??0??0000000?00??????????????????0?00?0?0?0?000??0??????12?????000?00??????????????0??0?0?0000000??00?000?0???00?00??????000?0??????0000?000???????????????00??01???????????00??0101100?0??0??0??10

Alvarezsaurus_calvoi ??????????????????????????????????????????????????????????????????????????????????????????????100????????0?2?10?2?12????????????0?0?00????????0?????00011??0??2???????????????????1?00???0??0??10000000???0????????1???0????00???????0???????????????????????0?????[12]???????????????????????????????????????????????0?1???00???????????????2?????????0?0?0????????????????????????????????????????????????0??0?0?001??2????0000000????????????????0??????????????????????????????????0???????110?0?0??00?00??

Patagonykus_puertai ?????????????????????????????????????????????????????????????????????????????????????????????1?011?111???[01]12[01]10?2????????????????00200??0110??????1????1????1??0?????10????21101??1100?000100001110??0????0?1??0?0?1???00????????0010?0?????????????????????????????0??????????????????????????????????????????????001????????????????????20?00?00??01??????0?0?000???0?00???????????????????0???????????0???0????101200000000000??00?????????00??0???????????????????????0?????????????1??0????0?????0100??

Mononykus_olecranus ?????00???????112???????????????????????????????????100???????????????????????2????0????????1?1?11101101?????10?2??????1???1000?000200030110?12201100??1????1??000?0?1?????3??0???210100111011211100030000001??00???1??0?0??00?0?0???00???????????????????????????10011??????????????????????????1?????????????????001???????220???00?????2???0?0?0?0?001?0110??0002000?00[01]?0000?000??0000???300?0???????0??00????1??2000100000000??0000?00?00?0??0??000???????01?0?????0?0?????????1???1???1?0???????0?00??

Albinykus_baatar ????????????????????????????????????????????????????????????????????????????????????????????????????????????????????????????????????????????????????????1????????????????????????????????1101???11100300000?????????????????0000??????????????????????????????????????????????????????????????????????????????????????????????????????????????????????????????????????????????????????????????????????????0??????0????????010000100?0000000??0??0????00????????0???????????????????11?????????0?????????????

Shuvuuia_deserti ?011000000000?112011000?0?0?0?111?11002100001010010010???1?1000010100000100?10211??000??0111111011101?0??1?201012012110100?1000?00020003011??122011000?1??011?2000?0?10021032?0???210100111011211[01]000300000011000001100000010000?00??000000000001?0100?00000?0000?10010000000??101?0??1??00110?01?100?0?0[12]0????010?001000?0?0220?0??0?????20?10?000?0100000111??0001000?00[01]?0000?000?????????300?0??000??00?0?0?0010020001000000000?0000000?00000000?000001000001?01?1010001????????1000???0110?0???000?00?0

Erlikosaurus_andrewsi ?0110?02?0?1?0??1010011100??0001?1000001000010000100000??1111210010000000001?001000001?????????????????????????????????????????????????0?????????????????????????????????????????????????????????0?00?0??????00??01??00?0?00????????????0?00001010010????0000?000????0?000000000001???10?0100???00000?000000??0000????????????????????????????????????????????0?0010000?001000?000?????????????????????????????????????????????????0???0000??0?????0000?0????000???0?000?0???????????000??????0?????0?????10

Segnosaurus_galbinensis ??????????????????????????????????????????????????????????????1??10?0000000???01000001???????????????????1???0????????????????????11???00???????010?20021?0000?1100211?0?1020?0?????????00??0?000?0000?21?0??00????1??0?0???00?0?00??0?????????????????????0?????????0????????????0????????????????????0?0????0????????????????????????????0??????0????00????????????????????????????????????????????????00??000???10??????00??0??000000000??2??0????00???????????????????0????????????????000????0??0??00??

Alxasaurus_elesitaiensis ?????????????????????????????????????????????????????????????210?100???????????100?001??????????0?01010000?1?000??02?0?1??????????????00000?10?0000120021?00?01010?211?021?2??????01????00????????00000210000??00??1??00?0??00?0?00??00????????????????????????????0????0??????????????????????????????????0??00???0??0??[01]0?????????????????????????0??00??????????0?0???0???????????????????0000???000???????????????????????????????????????0000000?0????0???0??????????0??????????????0??0000?????0??????

Incisivosaurus_gauthieri ?01?0?01?001??1??100011101001001?010?12?00011000101011010111121010000100?1?000210??0000??????????????????????????????????????????????????????????????????????????????????????????????????????????????????????00??00??01?0??0?0?????????000000001000102?00010??100??????00000000001?0001??0000???0000101?1100??0000?????????????????????????????????????????????????????????????????????????????????????????????????????????????????????????????????????01010000???0??000?0?0??????????00???????????00?????00

Avimimus_portentosus ?01?0??10011?00??0??1?1???????1???1?????00?11??00100110??????2?1???00?0?0111????????????011010110101?1?00??100????????????????????????0100??????????00?211?01??0101201010?010?0?1000100?0???00011110020???00??0?0?01?02?000000?0?001000????????0?????????00??01??0?01001????????????????????0??0???00??0??????????200100??????????????????????????????0?????0?0?0010000?000000000????????????2???????????[02]0?000?0000020?010000000000000??00?01??0??????0????????????????????????????????1??0110????????0???-

Microvenator_celer ?????????????????????????????????????????????????????????????21?20?0????????????????????011?0?11000111100???0?1?1002????????????00?000?11000?????0010002???0000?????????????0110??0101100?0000010???????0??0???00??11?20?0??00???0?1??0??????????????????????0???0?2100000?????????????????????????????????????????000????????????????????20000?000?01?????00?0??010?00?000000000000010000?????00????????0???0??000002000000000000?????????????0??0??????????????1????????0?????????????1??01?????0??00100??

Ingenia_yanshani ?01?0???????????????1?1?????1????????????????????????????????21120?010000111?1???????-???????????????????1???01????2?00???0011120011??00000??100000100021??????01012010011010?11101101?0000?00011?000000000??0000??11?2000?000?0?0010000??????????????????00001?0??2100?1000000??1?????0?0??0??0000?0?0?1?10???000?0????0[01]0??02??????0101??0??0???0?0?0001000?????1100???00?0?????????????????00????0?00?00?000?0?000??0?0?000?0?0?0??00?0????00?000000????????0110??00?1?0?1101000??00??0101000?00??00100?-

Rinchenia_mongoliensis ?01?0???0??????????0111?1???1?11?00010??00???0000?????00??1?12112??01000?111?1???????-????????1??????????????0?????210?????????2??1???00?0???1??0001000?1?????1???????????????1?????????0????0??0?0???????0??00??001??2?00?????????????????????00????????00???110??????2??0110????????10?0?10??0???0????????????0????????????????????????????????????????????????????????????????????????????????????????00???0?00???????????????????????????????????????????????????002?0???????????00???????????0??0??00?-

Oviraptor_philoceratops ?01?0?????01?1????0??1??111?1011???0?????0?11???01?0???0?11?121120?01?0001?1?1???????-???????????????????????0????????????????12??1?????00???10??00?00??1??0????????????????????????????0????0????0??0?????00?00000???2?00?0???????????010000?0?0???????0??01???0????00???0?00????????10?0?00??0??00?00?1?1????00??00?00????0????????01010?0?00?0?0????0?100??????1100???0????????00?????????000?0??00000??????????????????????????????????????0??000?????10????1?0???02?0??1101100??????0?????0?0?00??????-

Conchoraptor_gracilis ?0110?????????1???00111?11??1?11?000??21000110?00????1?0????121120?010?00111?1???????-??01010110010??1?012?110??10????01?1?????20011000010???????0010002100010101002010??101001?1?11010000??00010000010?000??000?001102?0?0000?0?0010000000002001???????0?0??0100012??????00000000?????????10???0100100????????000?0?00??????????????????????????????????????????????????????????????????????????????????00?00??000002000000000000?0000?002?01?????????0?010?000??0??002?00??????????00???1??????0?00??????-

Chirostenotes_pergracilis ???????01?01101??0???1?110?0??????????????????????01010??????21120?0000001???1???????-????????1101?11????1?12???0????????????????101?1??????????00?100021?00101012120101110?011???01??100???00?100000200000??000?0?1??20?0?000?0?00100????????????????????00?0?????[12]????10????????101????00????????????01?10???0???001??00????????????????20000?00000?????????????????????????????????????????????????00000?00??00000?00?0????????000000?0???0000?????001010?00???0????????1????????0?????1????1???????????-

Caudipteryx_zoui 00110?????????????0?111??10?0001?10???21000???0?0????????????21120?0???????0?1??0?????00????0??00????1?0?0???01?????20?????0???0??0???01?0???100000?000?1????0?0101201???1????101?11?????0????01000??1?00?0?000000?1102000??00-0?001000000000?00????0???00?0?0000?1[01]1000000000???????????0??????0000????1000???000?00?000?0?0?????????????20??0?0?000?10??00???????0?0???00?00????????????1??0000???0000000?000000000??0?0?00????0000000??0??2000000??0????????01101100??01?110???0?001-100011000-010011000-

Citipati_osmolskae ?01101001001??221000101111?01011?000102100011000010001000110121120?010000111?1???????-?1011101100101111001??201??002100111?0111200110100100?110000010002110010?01012010??10101111?2101000000000?000000000000000000011020000000-0?0010000000002011???0???[01]000?010001210001000000001?02?1??0000??0000010001010??00002001000[01]0?00?0010000101020??????0????011000?0?0010000?000000000000?00100?0??0?0???0000000????00000?2000000000000000000002?000?0000000000100000110??00[01]10?011011000000??00???00?0??0?????0-

Epidexipteryx_hui ?00??????????????????1???0??00?????0??20?0011?????????????????100?0?0???00001020???10000???????????????0?[01]????1?1?122??10??0????0101?010?0??????00?1???????????012?????011?02?0??????????0????011?0??0?10?000???00??1?1?0???00?0?00???0???????????1??2?????0????????1?0?????0??????????0???????????????????????0000???00??0?0??????????????0??0?0??????0???0?????????????00?[01]0????????????????????????????????????????????????????10?0?0?0????00?00???0?????????1??11??1????????????00?????011??????0???????

Rahonavis_ostromi ????????????????????????????????????????????????????????????????????????????????0???????????????011111???1?01?011112?12???????????0??11??011????????01111?1011111003?10121011121??21110001000?011001101?0100????0??1?????0??11001011111??????????????????????0?????????????????????????????????????????????????????001000[01]0???????????????2????????????0100?????????????????????????010100???????????????000000?000000000100000000?00000000?000??01???0????????0?1?11?????1????????10???1??0110???0??00102??

Buitreraptor_gonzalezorum ?0110????????????????00??11??0??????????000?1???01?0?????????00??001???0?????0210--100?0010111100111?110110100011010?121???????11101111010?1?1100001[12]1?11110111110230101110111[02]01??11200001000011?01111000000??00??1??00?0??1101000110000?00???0?-0????000??00?00?10110?00?0???????????0???????0?000101???0?????00000100000-0????????0100010000?0?00??0110000?0-1010000000011101??1101?100????1?00-10000000000000000000001?????????10000000-0000?001100????????0?0????00101?110001010211101011000?11?1101121

Neuquenraptor_Unenlagia ??????????????????????????????????????????????????????????????????????????????????????????????????110??111110????????1??????????1?0??1?01????????0??2111101011111023010111?111[02]011?1020000??0?01??01111?0000???????11????0??1101100110???????????????????????0?????211?????????????????????????????????????????????0000?0???0?????????????1????????????0100?0?0-10100000000???01?????????0???????????????0000000000000000100000000?10000000-00???????00????????0??????????1????????10???1??0110???1??01011??

Austroraptor_cabazai ?010???????????????????10100???????112?0001???????????????????00?011???0?????0210--10?????00111001??11110??????????????????????????????00????????001???????????????????????1110??????2??????0?0?1?01111?????0???00????0???????0??0?????00100??01?-00??????????????1[12]100?0????????????????????????????????????????0?0000???0-0??????????????????????????????00?0-10010000000??001????????????????0??????????????????????????????????????????-???????????????????????????????????????1?2111???1?0?????1??????0

Bambiraptor_feinbergi ?0110?001000012010[02]00?010111001?1100012110?1000101?00011?0?0?000?0100?111000?010010100??1110?1100?1??100?0?1100[01]1011??2????0101011011110?001?1000001110211?0111?102201?111021100???11100000000010001101?000000000001100000000001?0010?010100??11?110??0000?0000000121000?00000?0??00000??0000??000000?01?000??0000000000??0??0?0?0?0?0000020000?00000?0010000?0?0?1000??000000000?00010??????00000??0000000?000?000000000000000000000000?00?010?1000000001110000110??00011101100?100000010101100110100?000?0

Sinornithosaurus_millenii 0011?????0??????????00???1110????1000111100?1???01??0????????00?00100??1???01010010100????????1??1???????0?1?00?1??1???????01?1?11011110?0?????0000110?211?01?111023?1?111021?2?1???1?????????010001?1100?0?00010001??0000???01101111001000000111100?00?00?????00???10000?000????????000????0????0000???1000??00?0?0????0?0??0???????00?0?[12]0000???0?100000?00?0??010?0??00????????????????????0000??0000?0000??0?0?00?????000??0?0000?00?0???0011?11000????????01??10000111?1100?101000010111120?11?0??10120

Microraptor_zhaoianus 0?????????????????100?????????????????????????????????????????0??011?0?1???0?01001000?????001?1??01?1100?01???0110?1212111?01?101111111010??111000011012111??1111023?1?1110211201?11111??00?0001110111110?100??000?11?000???01010111100?0?0???1?110???0?00???0?00???10??0?000?????????????????????????0?0?0???????000100?[01]0?00?0000?001000200???0?000?00???10?0???10100?000??1?0?000?????????000???????0?00?0000000000????000?00??000000000??1111111??00?0110??011011???1?1?1100?1010000101?112???0?????01?0

Graciliraptor_lujiatunensis ?????????????????????????????????????????????????????????????????????????????020???1??????????????????????????0???11?12????????????????01011?1100001?????????????????????????????????????0??0?010?[01]11?1??0??0??00?????????????0???????????????????00????????????????100????????????????????????????????????????????????????????????????????????????????????0??????10?0???000??0???????????10?0000??00?000??????????????????????????????????????????10????????????????????????????????????01???20?1?????????0

Tianyuraptor_ostromi 101??????0000?2???1000?1?1110001110001[12]???1?10?101?00????0???000?0100?1??000?00001010?001100??100?11?100?0?100011011112111111110010111100001?1100001112?110011101003010111020?00??1?110??0?0????0001101??00000000001??0000?0011000011?01000000??1110?00000??00003011100000000???0??0?0?0???????00000??0?1?0????000000000000-00-0000000000020000-000-0000???00???0??0000-000??000?0???????0????0?0???000??00-1?00000000???0??????0??0?00?000???11?101??????0???001?0110????100000010??0?0101011?0??1?001112?0

Balaur_bondoc ??????????????????????????????????????????????????????????????????????????????????????????????????1?1??1????0???10?????????0????111[01]11101001?1?00001???0???0111?102?01?0?1?2112?????????????????2110001001000??00??1???????????0?00??0???????????????????????1?????2?00???????????????????????????????????????????000000?[01]???0????????????20??????0???0011000?0?001000???000?00?????010?00???21??0?00000020?100??0000??????00???0?000000000?00??0?00000????????010????????1????????00???1?10??200????001?0??

Saurornitholestes_langstoni ????????????????????????0210????????????111????????????11????0????????????????100101?00?11000110011111011011100?1011?1?1????????????111?????????000111221?1?1?1?1?0?????????????????11??0????00??001101??00???00?0?1??00?0000010?001000????????1110011???????0????1210???????0????????????????????000?0??????????0??????????????????????????????0???00??1????????????????????????????????????????????????0?????????????????????????????????????0???00??????????0??????00111????????00???1?????????????????20

Adasaurus_mongoliensis ?0110????0????2??????????????0?????0?1??11?1?0?101??001??0?????0????0?1??0?????????????01100?11?0111?10?111[01]100??011?1?1??????1?111111??????????????1022111010101?2201?1?11211001?111000000?000?11010010010??00??00110?0?0?0001??00100??1??????11????????00?00????1??????????0?????????00??00???000?0???????????00?001000[01]0???????????????200?0???0-??00110??????????????????????????????????????????????00?000000000000000000000000000?002??10?00???00???110000??0??0001?1?????????0??????0??????0?101101??

Velociraptor_mongoliensis ?01101001000012011200001011100011100012111?1000101000011101000000010011110001010010100001100011001111101111100011011112111001011111111001001110000010022111011101022010111121120111110000000000111011010010000000001100000000011?001010101000001110011000000000000111000000000000?000000?0000??000000?0?0000??00000000000[01]0?00??000?00000020000?000?000011000?0?001000??000000000000010100???00000??0100000?0000000000000000000000000000000?0100000000010[12]1100001101100011100000?10000101010100001?000110120

Deinonychus_antirrhopus ?0110???1???????1??0000?011100011100011?111100?1??00001110100000?01001111000?0100101000?110001100?1111011????00110111121??????1?1101110010011100000100221110101010220?01111201001?1111000000000100011010010000000001100000?00010?0010001010000011110110000???00000121000000000?0????000????0??????????000000??0000000000?[01]0?0?????????????20000?000?000011000?0?0010000?0000000000000101?0???00000??0100000?000?000000000000000000000000000?01000100000????????0?1????00111????????00000[01]01010200100?0?10120

Atrociraptor_marshalli ??????????????????[02]00?0??1010????????????????????????????????00??010???????0?0000101001??????????????????????????????????????????????????????????????????????????????????????????????????????????????????????????0????0????????????????11?0???0??111??????????1???????????0??????????????????????????????0????0????????????????????????????????????????????????????????????????????????????????????????????????????????????????????????????????????????????????????????????????????????0???????????????????0

Achillobator_giganticus ????????????????????????01?1?????????????????????????????????????????????????000?101??????0?01100?11110???????0??011?11??????????101????????????00??10220??11010002101?011010?001?21110?0????00?000?101????0???????1???0????001??00100011100??0??100?????????0?????????????????????????????????????????????????????000????????????????????20000?0?0?0?0??10??????????????????????????????????????????????00???0?00000??000???????0?0000????????0???????????????0??????????0????????????00??0??????0??0?111?0

Utahraptor_ostrommaysorum ??????????????????[02]00?0??????????0?001?????????????????????????????????????0?????101??1????0?1100?1??1????????0??011?????????????101?1???????????0?????????0?01????1???????10?????0111?00??0?001000100???10????????11??0???????0?????0???????????1???0????????0???11???0???0???????????????????????????????????????0000???????????????????20000?000000???????????????????????????????????????????????????00???????0??0000000000000?0000?????0?00????????????????????????????????????????????????????1???????

Dromaeosaurus_albertensis ?0??01000000000010??0???0?01??01110????1111????101?1001100??0000001001111000?0000101001?????????????????????????????????????????????????????????????????1??????????????????????????????????????????11?1?0????00??00??00?0?00??1?????????1?00??011000100?00?00????????????0???0000?00000??0000??000000?000000??00???????????????????????????????????????????????????????????????????????????????00??????????????????????????????????????0????0?????????0101110000??0??000?0?????????0??00???????????0??????20

Tsaagan_mangas ?0110100100001201120000101010001?1000121011100010110000100??000000100?1110001010010100001100??1??????1?????????????????1????????11?111???????????????????????????????????????????????????????????????????????00??00??00?0000???????????1110000011?00?00000000?00001????0000000????000000?0000??000000?000000???000????????????????????????20000???0?0?0??10????????????????????????????????????????????????????????????????????????????????????0????????0111000???0??00011?0??????????10???????????00?????20

Hesperonychus_elizabethae ???????????????????????????????????????????????????????????????????????????????????????????????????????????????????????????????????????????????????????21??010?????????????211211?????????????????????1????????????1????????0?0??1??????????????????????????????????????????????????????????????????????????????????????????????????????????????????????????????????????????????????????????????????????????????0???0??????????????????????????????????????????0???????????????????????????1??2??????01101??

Mahakala_omnogovae ??????????????101??????????????????????1000???????0?00110????????????????????02????1???00??0?11?011?111??1?100011012110????????????????00??1110000?100?211101?2??????????????????0111100????0?011001101?00000??00??11?0?????0010?????00????????0?????????????0????1[01]1?0??????0?????????????????0??1?0????????????00001000[01]0????????????????????????????00??[01]0???0?0000???0?????????????1001???0??0???000000??0??001??0???000000000?00000000?000??00?000????1???0??????011?0????????10???1???11?00????1??00??

Shanag_ashile ??????????????????1??1010110?????????????????????????????????00??010?????????01001011????????????????????????????????????????????????????????????????????????????????????????????????????????????????????????????0????0????????????????10100001???00????????????????????00??0??????????????????????????????????????????????????????????????????????????????????????????????????????????????????????????????????????????????????????????????????????????????????????????????????????????????????????????????0

Archaeopteryx_litographica 101?000??000??112010010??1110?011000002100?10?0000??100111?0?00000110000?00000200??00100?1?1???00?0??1?0?0???0021012211001????1011111111000?110000010112111010?11003010121011?212?111100000?0001000001030?0000000001100000??00?000110010000001001?01000000????0000?020000?0000000??0110??00?0??000?00?0000???00?0000000[01]000?0????????00000?0000?000000000000000?0011000?000??000?0000100000??00000?000000000000?0?00000000?00?0?[01]1000000?00???00000100001010000011011101?0101100?100000011101120011?00110101

Jeholornis_prima 10???0????????1???0???0?????001??????????????????0???????????0000?1???0000?1?1?????????0????????0????1?0?11???02111021??01?0???011001110001??1000001011?1??0??01?0???1???1?211?10???????01????0101101003000000000??0??1000??00-010????1???000?1?????0???0??0???0??12200?10010??????????????????0????0??00000??00?0000000000?0??001???0000?00000?0?1000110001000?0010000?000?0000?00001000010110000?000000000000?00000?010000000001000001000?00000001100????????011?1110???1?1100?10?00??11101120?11??0?101?0

Sapeornis_chaoyangensis ?011??????????????0?010??11000????00??2??0?00????0??????0????0000010??1000000020??????00????1???000????0?211??0210003??101?????21101111010011100000101121??00?211000?101[01]00211211????1??01??1001210?10030000000000????2000??0??0100??0100?000???1???00??0???00000??22000000000??????????????????????????0?00???00000000000100????????0000020000?00000?000001000?0?01010?0010000?0???010?1[01]10?11100??0[01]00?0000?0000000?000??00?00??000001?00??0?00001000????????001?1?1011?1?1100010000??111011?0?1???0??01??

Confuciusornis_sanctus 10110?????????????1?000?00??0001???0??2??0??0??000?01???????000010000?100001?1???????-?0??????????1011?0?2???0?2????3??111?11010??13111000?11110000001121?1?1??11000?1?111022?21?12??10??11??120211010030?0000000001102000??00?0101??11?000011001??????0??????000?122001[01]00110?????????10??00??011200?001[12]01111100000100001001000120000?00?0000?0??0??000000000?000211??0010000000010102101011[01]?10?0000001010000000001010100100011000011000?00?0000[01]000???1000001101110?00??1100?10?000?11101120????00?????-

Yanornis_martini ?01???????????????1?010?????0?11???0??2??0??????00???????????0000011???0???000?1???00??0????1???0????????4?1???????03??????110?011031110?011?130010????????????????????????22?010?2??10??1??0?0121[23]0000300000??0001???00?0???????0???21?0?0?????????????????????????200100011??????????10???????1??????????????????001?00???0210?[12]??10100001010?1?11?111100111??0101?0101?10000?0?????021[01]101311[01]1100[01]100?0?1?0??0?00??????0??00?1110[01]?1?00??1?0??01100????????01??1????????1100?11??1???11?1101????00?????0

Yixianornis_grabaui 101????2?021??1?????0?01????0?1?1?0????????????????0100??????000?010???000?00110???10?01???1???0000??1?0?40??0???0023???11?1100011031110?0010130000100021?101?21100301000102222??0211?0??1??????2130100100000??000?0??1000?20??0?000001??????????????0??0????0??0?1220010001???????01??1????????11[01]?????1?0?????102001000?11021??[12]??10100001010?11110111100111100?0110???01?000???0?01021[01]10?31201100[01]100?00100?00?002?101??????11110[01]?1?00??1?0?001100??????00011?11?01????0100?10??0???1101101?????0??????

Jixiangornis_orientalis 101????????????????0010?????001????0?0??00000??????0100??????000001????00??1??0????????00?0???1?00????1??20???02??1021??11?1?000110311100011010000011112101010211000010101?211?10?2?11?001??1?01[12]1101003000?00?000?0??1000??00?0100??110?001?1?????????00?00?0000?12200?00010??????????????????????0?????000??00?000?1?0?10?11?0?????0000000000?0010011110010?0?0000000?000???0??0????0??010?00100??0000?001000000100??0000??00000100000?00?0000?001100????????00??11????01?1100?10?0???????????????????????

Apsaravis_ukhaana ??????????????????????0??????????????????????????????????????0002?1?0??0?????????????-?1??11??10200??1???5?100021??23??????1?010110311000011113003??000?1???1?200000?1?021?2220??12?010?????1??12130100?00000??20???1?20?0?????0?00??21?????????????????????????????200?10?????????????????????0?1[01]?????1?0???????2001?[01]001??21??1????????00000?0?1000111011111?01011010[12]0111110000101021110?[23]120100?11??20?1[01]0010111?110?1012112111111?0000?1?0??01101????????011??????0?1????????00???10?0?11?0?1??0?-100?

Patagopteryx_deferrariisi ?0???????????????????????????????????????0010???????????????????????????????????????????????????2????????????????????????????????????????0?1???????????211101?????????????????????2?010001??100121301001?000???????1????????00?0?????1???????????????????????0?????0???????????????0?1??????00??111110000?????????1000000????????0????????000????0101?1110[01]00???[01]?10?0???01000001[01]0001?[12]00???30???????00?2000000?010120????0?000[12]11001100000?[01]?0??0?100?1?100??01?0???0?001????????00???10?0110?0????0??00??

Neuquenornis_volans ??????12????????20?????????????????????????00?????00?????????????????????????????????????????????00??????????????????????1?11011?1031110?01111000???????????????????????????????????010???????????[01]010030??0????0??????0?00???????????1???????????????????0????????0100????????????????????????????????????????????011???????21?????10110??0100?001?001?0??[12]??1???01?0???0?????[01]?????????2???20?1??01????????????????10?1????????1?0???1011???????0?000???100000110?????????????????????????????????????????

Cathayornis_yandica ?0????????????????1?010?????0?1??????????0???????????????????00????????????00001???????0????????[02]????????3?????2????3???0??11?02?1031110?011?1300?0?01111?0?00?11000?101?102122??????????1???0??[12]1[01]1?0?3000?0???00????0??1??0??0100???1?0?????????0??0?????????????2200[01]0?011???????????????????????????0??????0???011??0010?20??1??10110?101????010?01100010010110[01]?01020111110?[01]?1?????210120?11?01?0101011?0?000001???1?0?0?1[01]1?0???????????0??01110????????01????????01??????????1???0111121?????0?100?0

Concornis_lacustris ??????????????????????????????????????????????????????????????????????????????????????????????????00????????????????????0??11?02?1031110?0?1???0030????????????110?101??11?222???0???1???1???0?1[02]11??0?3000?0???0????????????????001??1????????????????????????????2200????????????????????????????????????????????011????10?20??1?0101100101?0?0010001?0??[01]001?110??0102?1???10???1[01]1?[12]??????????????[01]????????????00?????0?100??1?00??1?[01]1??0??????110?????????????????????1100110??????01011?1????????????

Gobipteryx_minuta ?0????????????????1?01010?0?0?????????????????????????????11?000?0?????????1?1?????????????????????????????????????????????????2????????????????????????????????????????????????????????????????11???????????????????????????????????1????0????????????????????????????1100100?001?0?10?????00?????0???0??0???1???????????10??????????11??10000?0?100011000[12]001?1?0110???0????????????1?121??[012]0?????1?0??1????????000?0???10?001111000?1?11?0??????????????????????????????????????????????????????????????-

Vorona_berivotrensis ?????????????????????????????????????????????????????????????????????????????????????????????????????????????????????????????????????????????????????????????????????????????????12?010011101001112110???00????????????????????0?????2????????????????????????????????????????????????????????????????????????????????????????????????????????????????????????????????????????????????????????????????????????????????????1010111100001?000000?????????????????????????????????????00???????11??????????????

Songlingornis_linghensis ????????????????????0?0??????????????????????????????????????00????????????000?0????0??????????????????????????????????????11??[01]???3?????????????????????????????????????????????????????????????????0????0?????0?????00?????????????????????????????0??????????????????0?01???????????????????????????????????0?????????????21??[12]?000100?010???1?11011????????????????????????????????????????????????????????????????????????????????????????0??0?????????????1??1????????????????????????????????????????

Pengornis_houi ?0110?????????????10010??0?00??????0?12??0??????0?????0??????000?001???????0?0?00??00???01??????20???0???2??????????3????1?????2?1031111?0??????03??001?1??????????????????2??2??????????1??????211???0?000??0??000???0??0??00???0???11?0?000??????????00?????00001220000?000?????????????????????????????0?????0??001??00100????????01[01]00?00??????0??1??012111[01]0?011010001[01][01]1?????1??1???10[12][12]0??1??1?11??????0????00?0????0??0[01]?1?00??1?11??0?0??0?100????????01?????00?01?1001011??100??1?1121????0???????

Hesperornis_regalis ?0????????????????00010100?00??????00021?001????00???00????1?000?001???10001?021???00??10101110?2100??11?50100?210?23??11??10??00103111??????????3??0202100?1??00000???02102220??12???0001??11?1213110010??0?00??01?1?0000?000???00??2??0?1111????0???????10?000??10?1?10?11112001?0?1010??1110011100?000?0???10102101000012?0?000100100?0???10?0???00001??0?????????0???0????0??????????????????????????20?1100001112110211110021111122122002?0?????00??????0001?0???0?000?0100?11??200???011????0?00??0000

Baptornis_advenus ????????????????????????????????????????????????????????????????????????????????????????????????2????????5?????????23???????????????????????????????????????????????????????????????????????????212??????????????????????????????????2?????????????????????????????????[12]????????????????????11001??00??1??????????2101000012????012?0?????01?10?0???000????0?????????0???0??????????01?[01]1[01]???????????????20?11000011121102111100211111?21020?2???????????????????????????????????????2?01??011??0????0??0???

Ichthyornis_dispar ?????0????????1220?????????????????????000111????0???????????000??1?????000??0210??100??1?01111?2100?1???5?000?21??33???01?100?001031110?011113003??0102?1??10211000????210222???12??10011??11?1213110???00?0??20?????00????0??00????21???????????0??????????????012200[12]0?11??????0????10[01]1?111011100001020???101?20011?101[12]?211022010100001010?1111011111011110010110111010000101[01]10112111123120110011?12001[01]00101112110211110021111[12]2?100002?0??011?100?10???0110??1??00?00100?11??200111011?1????00???0?0

Iaceornis_marshi ???????????????????????????????????????????????????????????????????????????????????????????????????????????????????????????1101?010311??????113?03????????????????????????????????2??1??1???????21?????????????20???1??0?????????????????????????????????????????????????????????????????????????????????????????????????????21?02[23]11???1101010?11110111101???????????????????????????????11131401110111020010??1?1?12110212110021??????????????????????????????????????????0100?11???????1?11?1????????????

Crypturellus_undullatus 10???012?020002?2001010100?00?111?12002100001011100010???1?10000?000??10?001?1???????-?1110111122100?01107?110??12?23??121?11010010311011011113003??001210001?20120111002102222??12?01000100110121301?0???01000200001?20000200?0?001021???120??01??????0?????00000102002112111[01]0101011111010110011011111111100101021011121121211112?10100021011010111111100111110110001201100001110101011111031401011111020?120110111211020211002111122210010100??011?10101000001111110000??1100?10??10-10?011??0?0-011-000-

Lithornis 101???????????????01010100?00?111??2?02?00?0???????????????10000?00????0?101?1???????-?1????????2????????[67]?1????????????[12]??11000010311110011?13003??000210101?20100101??2102?????12?01000???11?12130100?????0??200?01?2010???0?0?0???21???12???????????00????00000??200?11211100?01011111010110?11[01]1101?1111?01?102101?0111[12]1211122110100?01011011110111101111100110001[12]1110000101010101111113130110[01]11102[01]0120110111211020110002111122210010[01]?000011?1????????011?111??00???????????10-?110???1????00???0?-

Gallus_gallus 101??102?021002?2000010100?00?111?120021?0001?1000001????1?10010000000001101?1???????-?101[01]1111221?0?01007?120??12?23??1[12]1?11012010311020011113003??001211111?2?100111002102222??12?0100011011??213010010001000200100?20100200?0?0???21???121??01???0??00????0000010200110211121111122110111111111111011000110101121011120111211112110100021011111111111100111110110001201100001011101011111131401001211021?1211111112110202110021111322200111?00?01100010100000111111?000??0010110?000-101011010---001-000-

Crax 101101?2?021000??001010100?00?111?120021000011100000100??1?10000000000001101?1???????-?1000111122100?111?7?120??12?23??121?11002010311121011113003??0002100?1?2?100111002102220??12?0100011011?12130100100010002001?1?20100200?0?0???21???121??01??????00????0000010200210211121111122110111111111111011000110101121011120111211112110100021011111111111100111110110001201100001011101011111131401011211021?11111111121102021100211113222001100000011000?01000001111110000?11100011?100-101011??1-0-011-000-

Anas_platyrhynchus 101??102?021002?2101001100?00?111?10002??00?1?100010?0???1?10200000100?01101?1???????-?101?1111221?0?011?7?11???10?2310121?11011110311111011113003??0012000?1?2?100111002102221??12?0100011011?121311?0???010002101?1?20100?00?0?0?1021?0?121??????????00????0000011200210211111111122110211121111111011000111101121011020111211113120100101010?1[01]111111100011100110001201100001011101111111231401010111021?1111101111110102110021111[23]2210010200?0011?10?0100000111111?000??0100?11?020-111011010---001-000-

Chauna_torquata 001??012?0210002?101010100?00?111?100021?00010100010100??1?100000000??001101?1???????-?1011101112100?111?7?11???1012312111?10000010311111011113103??0012101?1?2?100101?02102222??12?0100011011??213010010000000200101?20100000?0?0?1021?0?121??01??????00????00000122001102111[12]1111022110111121111111011000111101121011020111211114010100101011111101111110211100110001201100001011101011111231401011111021?11111111121102021200211112222001000000011000101000101111110000?11101?11??00-111011010---001-000-

Hongshanornis_longicresta 101???????????????11010?????0?11???0????00???????????????????000?001??00???1?1?10???0??0??01??1?0????????[234]??????????3???1??11?011103111000111130020?0112???01?20????????2??2222???2??100?1??????21[23]01000000000?000?01?1????????0?0????1?0?0????????????0?????0000?1?200???011???????????????????????????00??????1????0????110????????01?0??11???0?10???11000111???110???2????0????????????1??2000??000100?0??0?0??000????????1???1100??[01]?00??2?0???1????????????????????????0100?11??20??110110?????0???????

Liaoningornis_longidigitrus ???????????????????????????????????????????????????????????????????????????????????????????????????????????????????????????????????3??1??0???????????????????????????????????????????100?1????0?21211003000?????0??????????????????????????????????????0????????????????????????????????????????????????????????????????????011?01??????????0???0?????????????????????????????0?????01???2??????????????????????????01?1?0??001111110201000?00??????????????????????????????????????????????110?????????????

Xiaotingia_zhengi ?01????????????????1?1???111000????0?2??????????11????????????001001??1??00??020???01??0??0???1?0?????10?01?????1??????10?1????01?01111?10???1000001011?1110?1101122?????102?12???????????10????????1?010001010000?1??0?10??00???0010?000000??1???00??0?????00?0???21000??000?????????????????????000??????????0??00?1000???0????????010002????????????01?000?0?00???0???0?0?0????0???????????01000?1?00000???0?0000???????????????????0??0?02????10000????????00??1??????1?1100?10??0???0101?00?0??00??????

Anchiornis_huxleyi 00110?1[01]??0??0???1110101011100011000?2??00?01???11?0???1?0??0000??01??1????00020?--11?10?101???00?0??010?01???01101210??011????011111110000??100000010?21?10011010?201?1?112112????1?1?000??1?01?000121100010?1000?1??00?0??0????0?11?000000001?0-01?000?????0000??020000?0000?????00000-?????0?0??0??0???0??????0000?000[01]0?0????????0000020000?0?00??0?10000?????10?0???0????????????????10?01000??0?00?00??00?00000????????????00000?0?00??0000000000?0??????00??1110?1?1?1100010??01111101120000100?100?1

Troodon_formosus ???1?112?1101000001???0?0?1?0??????20220000210?0??01100????0?10??001?????????0111010100???1111100101111111?1000?1020??11?????????????1?010?????000010??????????0?0?2?10?11000?0??01111000???00010000021??01????000??1?0??010???1??0??0?0?00000?0?0???????00????????????????????????01??0?000?????0??1?1?????????00???????????????????????????????????????????????????????????????????????????????????????????????????????????????????????22??2?0?????00000101001??0???1110?1??????????001?????0?????0?????10

Saurornithoides_mongoliensis ?01???1??1101???0?110001?2000????????2?????????????????1?010?100?0010??1???0001110101?????????1???0??1?????100??1??????????????????????????????????????????????01012010?010??10?1?11110???????????0???10?01??????0??1?0???????????010??00000??0?1?01?0?????0??000??????0??0000??????1000?0??0???????????0000???0???0010?0????????????????????????????????????????????????????????????????????????????????00????????0?0????00000000000000?20?02000000000000101001?10???1110?1??????????001??0??0?0???0??????0

Zanabazar_junior ?0110?12?110100?001?000??200000????2022000?21??0??11100??????100?001???1???000111010100??????????????????1?1000?1020?1??????????????????????????????????????????1?????????????????????????????011????2???????????00??00???11????????0??000000000100000?0??1???00???????00?000??????01??0?00???????????1?0000??0?00??????0[01]0???????????????????????????????????????????????????????????????????????????????????????????????00010000??000??2???????0???00000101001??1???11?0?1??????????00??????????????????10

Xixiasaurus_henanensis ??????????????????01000102110??????2?22????????????????????0?00??001???????000201??01?0?????????????????????????????????????????????????????????00?1????????????????????????????????????????????????????????0???00?????????????????????0?000000???01?0000?????00???????000000???00????????????????????????0???????????????????????????????????????????????????????????????????????????????????0??????0????????????????????????????????????????????0?0?????????????????????????????????00????????????0???????

Byronosaurus_jaffei ?????01???101?1100110001021?0??????20220??????????1?100??????0000001??11???000211??01?0?0???????010111????????0??02????????????????????????????????????????????????????????????????1????0?0??0????????1??????????0????0????1???????????00000000?1?00????0??00?000??0???000000????????????0??????????????0?0????0???001?????????????????????????????????????????????????????????????????????????????????????????????????000?????????????????????????????000100011??0????????1??????????001???????????0??????0

Sinornithoides_youngi ?0??0?????????????1?000??1??0????00???2???????1??????????????00??0010??????0001110?01??????11??001???1???????0011?10112101????1?00?1?101?0???100000????21??01??01??30???11?0??001??1110?????0???1?000110001?0??0?0?1??00?0???01??0010?0??00000????0??0??0????00???0?1000000?0????????????????????00?????1?00??000????????[01]0?0????????0??0?20??0?00000?0??1000???0?1000???00?0?????????0??010?0000???000000??00??0??000????00000000000000020?02000000000????????101??????1?010100??1??000?0101100?2??00??0??0

Mei_long ?0???????0????????11010?????0?11?002012100001?1010??100??????00010010??10000?021???01?0011011100011?1110?01???0110221111?11????111?11100?0?1?1000001?012111?1??1100301?1110211???0111100?0101001000??110011?0?0000???00000??000100?1??0?0?000000?001?0?0000??000001010000?000?????????00?0??0??00??0101????????0?00001000[01]0?0????????0100020?00?00000?0011000?0?0000000?0000000?000?01?1?0???00000????00000?00000010000??00000000000?000021?01000000??0???100??1010??101100?1100?10?00001???1??0????00?????0

Jinfengopteryx_elegans ?0????????????????1?01???2010????????1??00??????1???100??????00?00??0??1?0?000?1???0???1??????????????????????02????1?200?1?????1101111??????100000?????1??????????????????2??0??????????0?????????????????0????00????00??????????????00?00000????0??000???????0????100?0?000???????????????????????????0??????0?00????0??0?0??????????????00?0???0?0?00???0???????????????????????????????????????????0??????????????????????????????????????00?0000???????????0??11?01?????????????00??01011?0????0??????0

IGM_100_1126 ?0???002?0000?11[12]01?010??2000?011?020121000110?01010100??0??0000000?0?11000000211??00?0??????????????????0????01102???????????????????????0??1000001???211?010?010020100010121012??111000????0??2?001210001?00000011?00?0?020000?00100?0000000111?01?0?00?0000003??????000000??????0??00?00?0??0??000??00?00???0?0???????0????????????????????????????????????????????????????????????0?00???0000???0100000?00??0???0?00?00?????00?1?000?20?02????00000010100111??0??101?001???????0???????????????????????0

IGM_100_1323 ?01??????0???11???1?000??20000?1??020121?00?1??0?0??????00?0?000?0?1??1?00000021???0000???????????????????????011???????????????????????????????????00??1??????010?20100[12]102?1011???????00???0????0??2???01??00??0????0?0???00?0?00100?00000000?1?01?0?00?000?003??????0000000?????0?000?00?0?????000??0?000??0?00???????????????????????????????????????????????????????????????????????????????????????00?????00?00?0?00?????????1000??2????????????????????????????01???????????????????????????????????0

IGM_100_44_EK_troodontid ?????012???????????????????????????????????????????0???????????????1??11?????????1??????0????????????????????????????????????????????????????1?00000???????????????????????????????????????????????01?1?001???00??????0?0??1?????????0??????????????????????????????????????????????????????????????1?1????????????????????????????????????????????????????????????????????????????????????????????????????????????????????????????????????????????????????????????????????0????????????????????????????????

Sinovenator_changii ?0???002?000011110010101?2110?011?02??2??0011???1?10100????0?000?001?????0000011110?1?????11?10100011110?001000110221?1?????????110111???????100?0???0?211?01111100301?1110211201?11110000??10011000111??110?000000???0000110001000110000000??1???11??0000?000000??01?00000000000??00000?00?0??0000010100[12]00??0000?001000?????????????????20000??00?01001000??????????????1??????????????????????????????0001000000100000000000000?0?00?020?0100?000000000100010?10??1011000???????000001?10110??????01100?0

Talos_sampsoni ??????????????????????????????????????????????????????????????????????????????????????????????????1????0???0??????2??????????????????????0?????????????????????11?22?1???????1??????110???101?01000013100010??????????????????10000??0?????????????????????????????????????????????????????????????????????????????000????0????????????????????????????????????????????????????????????0?????????????????00??????????0????10000000?00000?20??2???????00????????1???????????????????10???1?????0?????????????

Gobivenator_mongoliensis ?0110112?110100000??00010111000110020220000110101?11100100000??0000101110000?0211??011??01[01]1111001011?11111100011022102[01]0???????0001111000?0?1?????????11??010101002010101011000??1111000?001001100012?10010?10???011000001100?1?0010??0000000101?00???000?000?000011????????0000100???0???00?????00101?0?????0000000100000?0?????????????20000?0000??00110?0???0?1000???0000?0??00?0????????????????????000000?0000?0000???????0?00000??2???200100??00??0???????????101101????????1000?0??0?11?0??1100000?0

Linhevenator_tani ?0???????????????1?????1????000??102?2??0002101???0100??1??????????????????0?011?010??0?????????01?????0??????????????????????????0??0001???????????????????????10?3????11??????????????0?????????0??211011??????????00???????11???100?????000??1??????10?0????00??121???????0??????????????????????????????????00?0??00???????????????????????????????01?0?0???1?1000???000101??000?????????????????????0???????????0?0???????????0000112??02???????00??????????????11????????????100?0?????10????1????????

Zhenyuanlong_suni 10??????????????????01???1110????10011?0???11????????????????????0100?11???010?0????0?????????1????????0?1????01???1?0??01?0???????????1?0?????0000?00211?001??010?301?1?1011?2???????????????????0??01100001???00????0?????0????0011?0100000??11?00??00????0?00????1000??000??????????????????????????????????0?0?0???0?00?0???????0??????????????????00??0???????????????????????????????????0????0?00?000?0??0??00??????????????0000000???01??100000????????00??111????1?????????0000101011?0?1??00?1???0

Changyuraptor_yangi ???????????????????????????????????????????????????????????????????????????00000?10?0?????????????????????????02???12???11?????0??????1????????0000?????????????10?301?1?1021?2???????????????????0??????00?????0?????0????????????11?0??????????1??????????????????1?0???????????????????????????????????????????????????0?0????????00????????????????0???0?????????????????????????????????????????????00?????????0?????????????0??????2????0?01??1??????????????11????????0??011??0?0?01?11?????????1????
